# Supplementary material for: Menstruation: Alles andere als peinlich!
Source: Springer Nature journal article supplement (doi:10.1007/s43877-021-0147-x), 2022-01-30
Supplement: MOESM1 [file 20082250]

## Literatur

### zum Beitrag „Menstruation: Alles andere als peinlich“ von Nadine Sutter, Christian Gnoth

HebammenWissen (3) 1/2022, S. 38-42

1. Gnoth C et al. The impact of disturbances in natural conception cycles. Arch Gynecol Obstet April 2020;301:1069-80
2. Critchley HOD et al. Menstruation: science and society. Am J Obstet Gynecol 2020; 223:624-64
3. van Eijk AM et al. Menstruation cup use, leakage, acceptability, safety, and availability: a systematic review and meta-analysis. Lancet Public Health 2019;4:e376-93
4. Splendid Research (online 3. September 2020; Zitat vom 28. März 2021). <https://www.splendid-research.com/de/splendidnews/pressemitteilungen/item/menstruation-und-nachhaltigkeit.html>.
5. Gille G et al. Menstruation(shygiene) und junge Mädchen – ein Update. Der Gynäkologe 2021;54:131-40
6. Ohlsen B. Weibliche Praxis und ärztlicher Diskurs – Zur Geschichte der Menstruationshygiene. In: Spieker I, Löneke R. Reinliche Leiber - Schmutzige Geschäfte. Wallstein-Verlag, Göttingen 1996, S. 236-57
7. Crede, K. Über eine zweckmässige Binde für Frauen während der Menstruation und zur Stütze bei Scheiden- und Gebärmuttervorfällen. Archiv für Gynaekologie 1884;24:281- 6
8. o.b. (online; Zitat vom 3. April 2021). <https://www.ob.de/ein-sicheres-gefuehl-seit70-jahren>.
9. Hickey RJ, et al. Effect of tampons and menses on the composition and diversity of vaginal microbial communities over time. BJOG 2013;120:695-704
10. Kaur R et al. Menstrual Hygiene, Management, and Waste Disposal: Practices and Challenges Faced by Girls/ Women of Developing Countries. J Environ Public Health 2018;2018:1730964
11. EDANA (online; 3. September 2020; Zitat vom 2. April 2021). [https://www.edana.org/docs/default-source/absorbent-hygieneproducts/tampons-code-of-practice-\(english\).pdf?sfvrsn=c0c491\\_10](https://www.edana.org/docs/default-source/absorbent-hygieneproducts/tampons-code-of-practice-(english).pdf?sfvrsn=c0c491_10).
12. Loon Lab Inc (online; Zitat vom März 2021). <http://www.looncup.com/>.
13. Phillips-Howard PA et al. Menstrual cups and sanitary pads to reduce school attrition, and sexually transmitted and reproductive tract infections; a cluster randomised controlled feasibility study in rural Western Kenya. BMJ Open 2016;6:e013229
14. North B et al. Preclinical, clinical, and over the counter postmarketing experience with a new vaginal cup: menstrual collection. J Womens Health (Larchmt) 2011;20:303-11
15. Karnaky KJ. Internal menstrual protection with the rubber menstrual cup. Obstet Gynecol 1962;19:688-91
16. Kadariya S et al. Chhaupadi practice in Nepal – analysis of ethical aspects. Medicolegal and Bioethics 2015;5:53-8
17. Dasgupta A et al. Menstrual hygiene: How hygienic is the adolescent girl? Indian Journal of Comunity Medicin 2008;33:77
18. Khanna A et al. Menstrual Practices and Reproductive Problems A Study of Adolescent Girls in Rajasthan. Journal of Health Management 2005;7:91-107
19. El-Gilany AH et al. Menstrual hygiene among adolescent schoolgirls in Mansoura, Egypt. Reproductive Health Matters 2005;13:147-52

20. Adinma ED et al. Perceptions and practices on menstruation amongst Nigerian secondary school girls. *Afr J Reprod Health* 2008;12:74-83
21. Das P et al. Menstrual hygiene practices, WASH access and the risk of urogenital infections in women from Odisha, India. *PLoS One* 2015;10(6):e0130777
22. Menstrual Hygiene Day (online; Zitat vom 25. März 2021). <https://menstrualhygieneday.org/>.
23. Robert Koch-Institut (online; Zitat vom 26. Februar 2021). [https://www.rki.de/DE/Content/Infekt/EpidBull/Merkblaetter/Ratgeber\\_Staphylokokken\\_MRSA.html](https://www.rki.de/DE/Content/Infekt/EpidBull/Merkblaetter/Ratgeber_Staphylokokken_MRSA.html) ;jsessionid =3DBE1E138BA07235A812A0F04EFA9C06.in ternet092#doc2373986bodyText10
24. Wilkins AL et al. Toxic shock syndrome - the seven R's of management and treatment. *J Infect* 2017;74 (suppl1):147-52
25. Todd J et al. Toxic-shock syndrome associates with phage-group-1 Staphylococci. *Lancet* 1978;2(8100):1116-8
26. Berger S et al. Menstrual toxic shock syndrome: case report and systematic review of the literature. *Lancet Infect Dis* 2019;19(9):e313-21
27. Parsonnet J et al. Prevalence of toxic shock syndrome toxin 1-producing *Staphylococcus aureus* and the presence of antibodies to this superantigen in menstruating women. *J Clin Microbiol* 2005;43:4628- 34
28. Schlech WF et al. Risk factor for development of toxic shock syndrome. Association with a tampon brand. *JAMA* 1982;248:835- 39
29. Nonfoux L et al. Impact of currently marketed tampons and menstrual cups on *Staphylococcus aureus* growth and TSST-1 production in vitro. *Appl Environ Microbiol* 2018;84:e00351-18
30. Schlievert PM et al. Effect of non absorbent intravaginal menstrual/contraceptive products on *Staphylococcus aureus* and production of the superantigen TSST-1. *Eur J Clin Microbiol Infect Dis* 2020;39:31-8
31. i Point-Systems (online, 23. Mai 2019; Zitat vom 28. März 2021). [https://www.ipoint-systems.com/blog/sind-menstruationstasseneine-gruene-luege/#\\_ftn1](https://www.ipoint-systems.com/blog/sind-menstruationstasseneine-gruene-luege/#_ftn1)
32. Hait A et al. The value of reusable feminine hygiene products evaluated by comparative environmental life cycle assessment. *Resources, Conservation and Recycling* 2019;11:150
33. AWMF. Leitlinie zur Diagnostik und Therapie der Endometriose. [https://www.awmf.org/uploads/tx\\_szleitlinien/015-045I\\_S2k\\_Diagnostik\\_Therapie\\_Endometriose\\_2020-09.pdf](https://www.awmf.org/uploads/tx_szleitlinien/015-045I_S2k_Diagnostik_Therapie_Endometriose_2020-09.pdf) .
34. Koks CA et al. Evaluation of a menstrual cup to collect shed endometrium for in vitro studies. *Fertil Steril* 1997;68:560-4
35. Koks CA et al. Matrix metalloproteinases and their tissue inhibitors in antegradely shed menstruum and peritoneal fluid. *Fertil Steril* 2000;73:604-12
36. Ahrens CC et al. Development and application of the metalloprotease activity multiplexed bead-based immunoassay (MAMBI). *Biochemistry* 2019;58:3938-42
37. Warren LA et al. Analysis of menstrual effluent: diagnostic potential for endometriosis. *Mol Med* 2018;24:1
38. Beste MT et al. Molecular network analysis of endometriosis reveals a role für c-Junregulated macrophage activation. *Sci Transl Med* 2014;6(222):222ra16
39. Miller MA et al. ADAM-10 and -17 regulate endometriotic cell migration via concerted ligand and receptor shedding feedback on kinase signaling. *Proc Natl Acad Sci USA* 2013;110:E2074-83
